# Supplementary material
Source: publisher figshare collection journal article supplement (https://wiley.figshare.com/articles/dataset/_/3564672)
Supplement: Supplementary file 1 [file 1]

## Appendix B

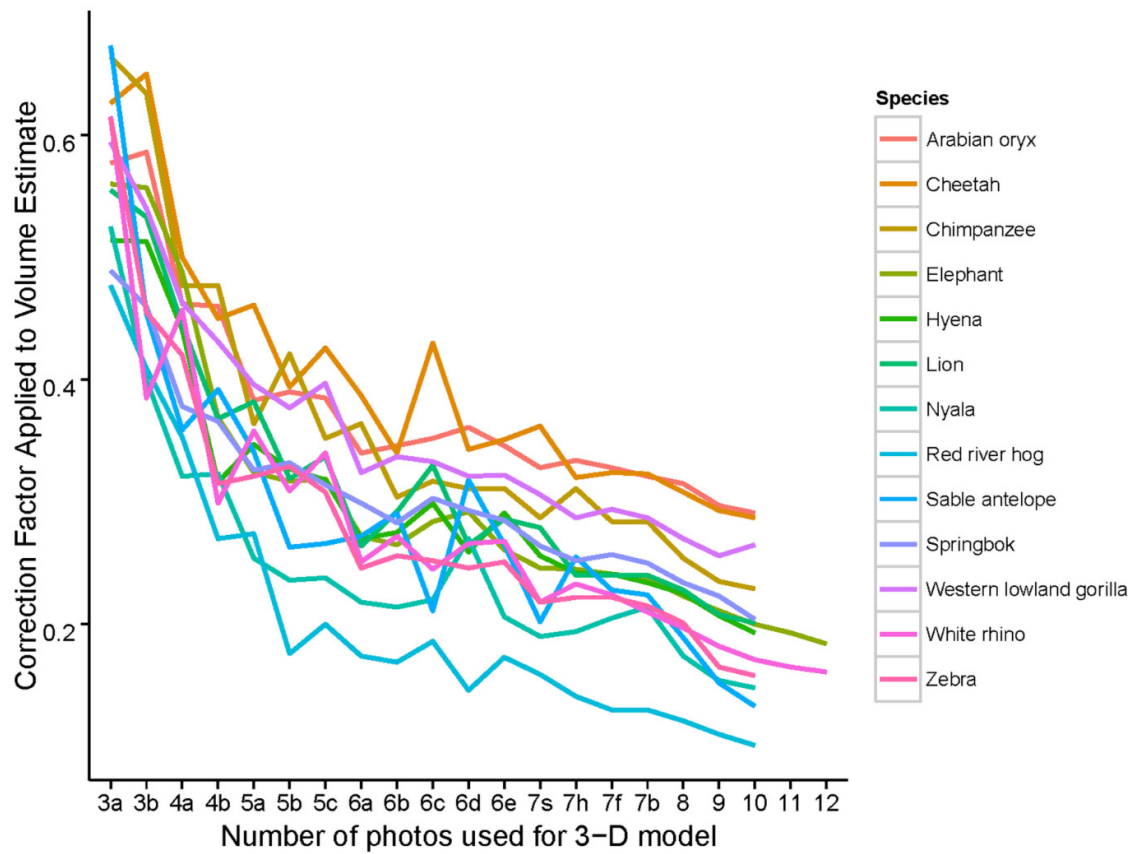

FIG. B1. Species specific correction factors decrease for approximating body mass estimation.

Number of cross-references silhouettes and scenarios are specified. Bongo, Pygmy hippopotamus and Bengal tiger were excluded due to sample size or lack of standard photograph angles.
